# Supplementary material for: Predictions of Native American Population Structure Using Linguistic Covariates in a Hidden Regression Framework
Source: PLOS journal article supplement (doi:10.1371/journal.pone.0016227), 2011-01-31
Supplement: S5 (10.1371/journal.pone.0016227.s005) [file journal.pone.0016227.s005]

## APPENDIX S1: GIBBS SAMPLER

To sample from the posterior distribution of the cluster labels  $Z$ , the allelic frequencies  $P$  and the regression coefficients  $\beta$ , we implemented a Markov Chain Monte Carlo algorithm with Gibbs sampling steps.

**UPDATING P.** This step is the same as in the software `structure`. It is performed by simulating the set of frequencies as

$$p_{kl.}|X, Z \sim \mathcal{D}(\lambda + n_{kl1}, \dots, \lambda + n_{klJ_l}), \quad (1)$$

where  $p_{kl.}$  denotes the vector of allele frequencies in the cluster  $k$  at the locus  $l$ , and  $n_{klj}$  denotes the number of copies of the allele  $j$  in population  $k$  at the locus  $l$ ,  $k = 1, \dots, K$ ,  $l = 1, \dots, L$ ,  $j = 1, \dots, J_l$ . For our analysis, we considered  $\lambda = 1$ .

**UPDATING (W, Z).** Since  $Z$  can be obtained from  $W$  in a deterministic fashion,  $Z$  and  $W$  are updated simultaneously. Using the Bayes formula, the joint conditional distribution of  $(W, Z)$  can be written as

$$\Pr(W, Z|\beta, P, X) \propto \Pr(X|\beta, P, Z)\Pr(W|\beta)\Pr(Z|W)$$

To simulate the couples  $(W, Z)$ , we use the following rejection algorithm.

- Step 1. For  $i = 1, \dots, n$ , simulate the couple  $(W_i, Z_i)$  from the multinomial probit model by generating  $W_i$  from regression equation and determine  $Z_i = k$  with its max-rule (see Methods, equations (1) and (2)).
- Step 2. Accept the couple  $(W_i, Z_i)$  with probability

$$\frac{\Pr(X_i = x_i|P, Z_i = k)}{\max_k \Pr(X_i = x_i|P, Z_i = k)},$$

and return to step 1. The likelihood function  $\Pr(X_i = x_i|P, Z_i = k)$  is given by equation (2) in [1].

**UPDATING BETA** We choose a noninformative prior distribution for  $\beta$ ,  $\beta \sim \mathcal{N}(0, A^{-1})$ , with  $A = 0$ . The Gibbs

sampler proceeds by updating values of  $\beta$  using its conditional distribution [2]

$$\beta|W \sim \mathcal{N}(V\tilde{X}^TW, V), \text{ where } V = (\tilde{X}^T\tilde{X})^{-1}. \quad (2)$$

## REFERENCES

1. Pritchard JK, Stephens M, Donnelly P (2000) Inference of population structure using multilocus genotype data. *Genetics* 155: 945-959.
2. Albert JH, Chib S (1993) Bayesian analysis of binary and polychotomous response data. *J Am Stat Assoc* 88: 669–679.
